# Supplementary material
Source: MDPI journal article supplement (https://www.mdpi.com/2813-2475/2/1/11)
Supplement: s1 [file s1]

## Arterial Stiffness in Patients with Sarcoidosis and Obstructive Sleep

### Apnea

Maurice Roeder, MD<sup>1</sup>; Noriane A Sievi, MSc<sup>1</sup>; Stefan Malesevic, MD<sup>1</sup>; Thomas Gaisl, MD<sup>1</sup>;

Daniel Franzen, MD<sup>1</sup>; Malcolm Kohler, MD<sup>1,2</sup>

#### Section S1 Inclusion and Exclusion Criteria

Participants will be included in this study according to the following criteria.

- |                                                  |                                                                                                                                                                                                                                                                                                                                                                         |
|--------------------------------------------------|-------------------------------------------------------------------------------------------------------------------------------------------------------------------------------------------------------------------------------------------------------------------------------------------------------------------------------------------------------------------------|
| <b>Inclusion criteria</b><br><b>(inclusive):</b> | <ul style="list-style-type: none"><li>• Subjects with a definite diagnosis of sarcoidosis according to international ATS and WASOG guideline</li><li>• Informed consent</li><li>• 18 years or above</li></ul>                                                                                                                                                           |
| <b>Exclusion criteria</b><br><b>(exclusive):</b> | <ul style="list-style-type: none"><li>• Moribund or severe disease prohibiting protocol adherence</li><li>• Continuous positive airway pressure treatment for OSA at baseline</li><li>• Use of oxygen therapy or home ventilation</li><li>• Physical or intellectual impairment precluding informed consent or protocol adherence</li><li>• Pregnant patients</li></ul> |
